# Supplementary material for: Host Resistance to Uromyces appendiculatus in Common Bean Genotypes
Source: MDPI journal article supplement (doi:10.3390/plants11050628), 2022-02-25
Supplement: s1 [file s1]

**Supplementary Table 1.** Sequencing of two common bean genes where Ba2\_B refer to the resistant group of the first gene (SA14F/R marker), whereas Ba10\_B refer to the susceptible group of the same gene. BF10\_FR refers to the second gene (SF10F/R marker) of common bean.

| Marker                        | Accession number | Sequencing                                                                                                                                                                                                                                                                                                                                                                                                                                                                                                                                                                                                                                                                                                                                                                                                                                                   |
|-------------------------------|------------------|--------------------------------------------------------------------------------------------------------------------------------------------------------------------------------------------------------------------------------------------------------------------------------------------------------------------------------------------------------------------------------------------------------------------------------------------------------------------------------------------------------------------------------------------------------------------------------------------------------------------------------------------------------------------------------------------------------------------------------------------------------------------------------------------------------------------------------------------------------------|
| SA14F/R<br>(Ba2_B)            | MT512396         | GGATTTTCCAGTGTAACCAAATTAGGACATAGCCGAAAAA<br>TGATAGTCAAATTGAAAAGAAGAGACACTATGGAAGAGGAG<br>ACTAATTGGTACAGCTCTAATATGATGTTTTTAAAGAGAAAA<br>ATAGATGCAAGAGATATTGAAACTGAGTACACAATATTTTCAG<br>TGC GTTTTATATAGAGTTAATGAAACAAATACAAATAAATAT<br>ACGAAATAATATTCCTATTCATATGATATGATTAGACCTATCA<br>TTACAAAGATCTTGATTAAATATATTACAAAGTGGACTTTAAG<br>CCTAACTCAACCCCATAAAACCGGCTCATAGAGTTGAGATTT<br>GCACCCACTTATATACAATGAAAGACTCTAATCTCTAGTCGAT<br>GTGGGATCTCCAACACACCCCCCTCACGCCGAGACTGCCAAC<br>TCGTGCGTGAGACTATATATTATGGGTGATCCGATAGCGGGTG                                                                                                                                                                                                                                                                                                                                    |
|                               |                  | GCACGATAGGCCCAACACAAATACTCGCTAGGATAGACTCGA<br>AATGGCTCTGATACCATATTACAAAGTGGACTTTAAGCCTAA<br>CTCAACCCCATAAAAAATAAGAAAGCAAAAATCATAAAATA<br>AAAAATATCATCTAGAATATTCTAAAATATTCTAAGATATATA<br>AAAAATATCATGAGATATTTGTCAGATTTTCTAACAGCTACT<br>CCAATGAGGCACTGGAATATGTACCAGTATATTTAGCATCC<br>ACACATAAAGCTTAGACTTACTGGTCATGCTGCTTCTCAACCC<br>AGACTTCCATCCATGAGGAAATTTGATTCTCTGCATAGATAAG<br>ATCATGTGGAAGATTATCAAGTACCTACACAAAGTAAAGTAA<br>TTGTTGTTAAATATCTAAATAACAATAACAATAATAAAAAAA<br>ATCACCATTAATGAGAAGAAAACACCAGCAAAAGAAGATT<br>TCTAGTCTGCAACATTGAATACCA                                                                                                                                                                                                                                                                                                            |
| SA14F/R<br>marker<br>(Ba10_B) | MT512397         | CATGGATTTTCCAGTGTAACCAAATTAGGACATAGCCGAA<br>AAATGATAGTCAAATTGAAAAGAAGAGACACTATGGAAGAG<br>GAGACTAATTGGTACAGCTCTAATATGATGTTTTTAAAGAGAA<br>AAATAGATGCAAGAGATATTGAAACTGAGTACACAATATTTTC<br>AGTGCGTTTTATATAGAGTTAATGAAACAAATACAAATAAAT<br>ATACGAAATAATATTCCTATTCATATGATATGATTAGACCTAT<br>CATTACAAAGATCTTGATTAAATATATTACAAAGTGGACTTTA<br>AGCCTAACTCAACCCCATAAAACCGGCTCATAGAGTTGAGAT<br>TTGCACCCACTTATATACAATGAAAGACTCTAATCTCTAGTCG<br>ATGTGGGATCTCCAACACACCCCCCTCACGCCGAGACTGCCA<br>ACTCGTGCGTGAGACTATATATTATGGGTGATCCGATAGCGG<br>GTGGCACGATAGGCCCAACACAAATACTCGCTAGGATAGACT<br>CGAAATGGCTCTGATACCATATTACAAAGTGGACTTTAAGCCT<br>AACTCAACCCCATAAAAAATAAGAAAGCAAAAATCATAAAA<br>TAAAAAATATCATCTAGAATATTCTAAAATATTCTAAGATATA<br>TAAAAAATATCATGAGATATTTGTCAGATTTTCTAACAGCTA<br>CTCCAATGAGGCACTGGAATATGTACCAGTATATTTAGCATC<br>CACACATAAAGCTTAGACTTACTGGTCATGCTGCTTCTCAACC |

|                                    |          |                                                                                                                                                                                                                                                                                                                                                                                                                                                                                                                                                                                                                                                                                          |
|------------------------------------|----------|------------------------------------------------------------------------------------------------------------------------------------------------------------------------------------------------------------------------------------------------------------------------------------------------------------------------------------------------------------------------------------------------------------------------------------------------------------------------------------------------------------------------------------------------------------------------------------------------------------------------------------------------------------------------------------------|
| SF10F/R<br>marker<br>(BF10_F<br>R) | MT512398 | CAGACTTCCATCCATGAGGAGATTTGATTCTCTGCATAGATAA<br>GATCATGTGGAAGATTATCAAGTACCTACACAAAGTAAAGTA<br>ATTGTTGTTATATATCTAAATAACAATAACAC                                                                                                                                                                                                                                                                                                                                                                                                                                                                                                                                                            |
|                                    |          | GTTCAAAACAATTTAAATATATCTTAATAGTTTTTCCTGTGC<br>TCCACCAACCACTCATCTAAGATCAAATCCAGTTCTTTGGCAG<br>TTTCTTTCATGGCTTTCCTCCCAAATTCATCAATCTCAGAACA<br>GGAACAGCATCAGCCACTGTGCACACCCCCTGTTAAGAAACT<br>CTGATAACTGACACACTTTATTGAATAATAGAAAAGCTAATA<br>TATAGCTGATTACATAAACTGACTATCCTAAAAACATAGCTAG<br>AAAATAGGAATAATAAAGACTAAATCAAACCTGAATCCAAG<br>TGCTATGCTAACAGCCCTATAAAATAGGACATTTATTCTAACA<br>AACTAACCAAGTCAGAATTAACCATATCATTTCCCTCCCTTAAA<br>CTAGACAGTATACTAGTTTAACTTAGGTGCATCACATACTCCA<br>AGTTTCTTCCTAAGATGCTGAAATGTCTTCAACTTGAGAGGCT<br>TAGTGAAAATGTCTGCTATCTGTTGTTCAAGTGCCACAAAACCT<br>CAGTTGTACAGCTCCTTCATTCACCATATCACGTAGGAAATGG<br>AACCTTACATCAATGTGCTTACTCTTTCCGTGCATCACAGGGT<br>TTTTGGATA |
